# Supplementary material for: The Lablite project: A cross-sectional mapping survey of decentralized HIV service provision in Malawi, Uganda and Zimbabwe
Source: PubMed Central journal article supplement (PMC4148932; doi:10.1186/1472-6963-14-352), 2014-08-19
Supplement: 12913_2014_3455_MOESM1_ESM.pdf [file 12913_2014_3455_MOESM1_ESM.pdf]

Section C: **PMTCT**

Coding purposes

|  |  |
|--|--|
|  |  |
|  |  |
|  |  |
|  |  |
|  |  |
|  |  |
|  |  |
|  |  |
|  |  |
|  |  |
|  |  |
|  |  |
|  |  |
|  |  |
|  |  |
|  |  |
|  |  |
|  |  |
|  |  |
|  |  |
|  |  |
|  |  |
|  |  |
|  |  |
|  |  |
|  |  |
|  |  |
|  |  |
|  |  |
|  |  |
|  |  |
|  |  |
|  |  |
|  |  |
|  |  |
|  |  |
|  |  |
|  |  |

|     |                                                                                                                                                  |                                                              |
|-----|--------------------------------------------------------------------------------------------------------------------------------------------------|--------------------------------------------------------------|
| C1. | Are PMTCT services available at this facility? [ 1 ] Yes [ 2 ] No -> if no, skip to SECTION D.                                                   |                                                              |
| C2. | If <b>yes</b> , start date of PMTCT services at this facility?                                                                                   | MM                  YYYY <input type="checkbox"/> Don't know |
| C3. | What is the schedule of PMTCT services at this facility?<br><br><i>List the hours for each day of the week that PMTCT services are available</i> | Mon:<br>Tues:<br>Wed:<br>Thurs:<br>Fri:                      |
| C4. | How many new clients were enrolled in PMTCT at this facility in the months listed below?                                                         |                                                              |
|     | # new PMTCT clients enrolled SEPTEMBER 2011                                                                                                      | <input type="checkbox"/> None                                |
|     | # new PMTCT clients enrolled AUGUST 2011                                                                                                         | <input type="checkbox"/> None                                |
|     | # new PMTCT clients enrolled JULY 2011                                                                                                           | <input type="checkbox"/> None                                |
| C5. | List the number of staff that provide PMTCT as a part of their <b>regular duties</b> at this facility, by provider type:                         |                                                              |
|     | # Physician(s)                                                                                                                                   | <input type="checkbox"/> None                                |
|     | # Clinical officer(s)                                                                                                                            | <input type="checkbox"/> None                                |
|     | # Medical assistant(s)                                                                                                                           | <input type="checkbox"/> None                                |
|     | # Midwife(s)                                                                                                                                     | <input type="checkbox"/> None                                |
|     | # Nurse(s)                                                                                                                                       | <input type="checkbox"/> None                                |
|     | # Nurse counsellor(s)                                                                                                                            | <input type="checkbox"/> None                                |
|     | # Dedicated counsellor(s)                                                                                                                        | <input type="checkbox"/> None                                |
|     | # Community health worker/HSA(s)                                                                                                                 | <input type="checkbox"/> None                                |
|     | # Other (specify)                                                                                                                                |                                                              |
|     | # Other (specify)                                                                                                                                |                                                              |
| C6. | List the number of staff that <b>have been trained</b> to provide PMTCT at this facility, by provider type:                                      |                                                              |
|     | # Physician(s)                                                                                                                                   | <input type="checkbox"/> None                                |
|     | # Clinical officer(s)                                                                                                                            | <input type="checkbox"/> None                                |
|     | s                                                                                                                                                | <input type="checkbox"/> None                                |
|     | # Midwife(s)                                                                                                                                     | <input type="checkbox"/> None                                |
|     | # Nurse(s)                                                                                                                                       | <input type="checkbox"/> None                                |
|     | # Nurse counsellor(s)                                                                                                                            | <input type="checkbox"/> None                                |
|     | # Dedicated counsellor(s)                                                                                                                        | <input type="checkbox"/> None                                |
|     | # Community health worker/HSA(s)                                                                                                                 | <input type="checkbox"/> None                                |
|     | # Other (specify)                                                                                                                                |                                                              |
|     | # Other (specify)                                                                                                                                |                                                              |
| C7. | What is the standard PMTCT regimen available at this facility? <i>Specify the ARVs and dosing schedule.</i>                                      | Mother:<br><br>Infant:                                       |
| C8. | Is this the same PMTCT regimen as the national guideline?                                                                                        | [ 1 ] Yes   [ 2 ] No   [ 3 ] Don't know                      |
| C9. | # Days stock-out of ARVs for PMTCT in past 3 mths                                                                                                | <input type="checkbox"/> None                                |





















Section E: **Laboratory Services**

Coding purposes

|      |                                                                                                                                                      |                                                                                                                                                                                                                                                                                                                                                           |
|------|------------------------------------------------------------------------------------------------------------------------------------------------------|-----------------------------------------------------------------------------------------------------------------------------------------------------------------------------------------------------------------------------------------------------------------------------------------------------------------------------------------------------------|
| 1e.  | Country site                                                                                                                                         |                                                                                                                                                                                                                                                                                                                                                           |
| 2e.  | Name of health facility                                                                                                                              |                                                                                                                                                                                                                                                                                                                                                           |
| 3e.  | District                                                                                                                                             |                                                                                                                                                                                                                                                                                                                                                           |
| 4e.  | Informed consent obtained from interviewee(s) [ 1 ] Yes [ 2 ] No<br><b>If no, please obtain informed consent before proceeding, and start again.</b> |                                                                                                                                                                                                                                                                                                                                                           |
| 5e.  | Date of interview                                                                                                                                    |                                                                                                                                                                                                                                                                                                                                                           |
| 6e.  | Start time of interview                                                                                                                              |                                                                                                                                                                                                                                                                                                                                                           |
| 7e.  | Name of interviewee 1                                                                                                                                |                                                                                                                                                                                                                                                                                                                                                           |
| 8e.  | Professional qualification of interviewee 1                                                                                                          | [ 1 ] Specialist physician [ 2 ] Generalist physician<br>[ 3 ] Clinical officer [ 4 ] Medical assistant<br>[ 5 ] Trained midwife [ 6 ] Professional nurse<br>[ 7 ] Enrolled nursing assistant [ 8 ] Enrolled nurse<br>[ 9 ] Counsellor [ 10 ] Nurse counsellor<br>[11] Community health worker/health surveillance asst.<br>[12] Other ( <i>specify</i> ) |
| 9e.  | Name of interviewee 2                                                                                                                                | <input type="checkbox"/> None                                                                                                                                                                                                                                                                                                                             |
| 10e. | Professional qualification of interviewee 2                                                                                                          | [ 1 ] Specialist physician [ 2 ] Generalist physician<br>[ 3 ] Clinical officer [ 4 ] Medical assistant<br>[ 5 ] Trained midwife [ 6 ] Professional nurse<br>[ 7 ] Enrolled nursing assistant [ 8 ] Enrolled nurse<br>[ 9 ] Counsellor [ 10 ] Nurse counsellor<br>[11] Community health worker/health surveillance asst.<br>[12] Other ( <i>specify</i> ) |
| 11e. | Name(s) of interviewer(s)                                                                                                                            |                                                                                                                                                                                                                                                                                                                                                           |

|  |  |
|--|--|
|  |  |
|  |  |
|  |  |
|  |  |
|  |  |
|  |  |
|  |  |
|  |  |
|  |  |
|  |  |
|  |  |
|  |  |
|  |  |
|  |  |
|  |  |
|  |  |
|  |  |
|  |  |
|  |  |
|  |  |
|  |  |
|  |  |

**PROCEED TO NEXT PAGE.**
